# Supplementary material for: Exposure to Corticosterone Affects Host Resistance, but Not Tolerance, to an Emerging Fungal Pathogen
Source: PubMed Central journal article supplement (PMC5045185; doi:10.1371/journal.pone.0163736), 2016-09-30

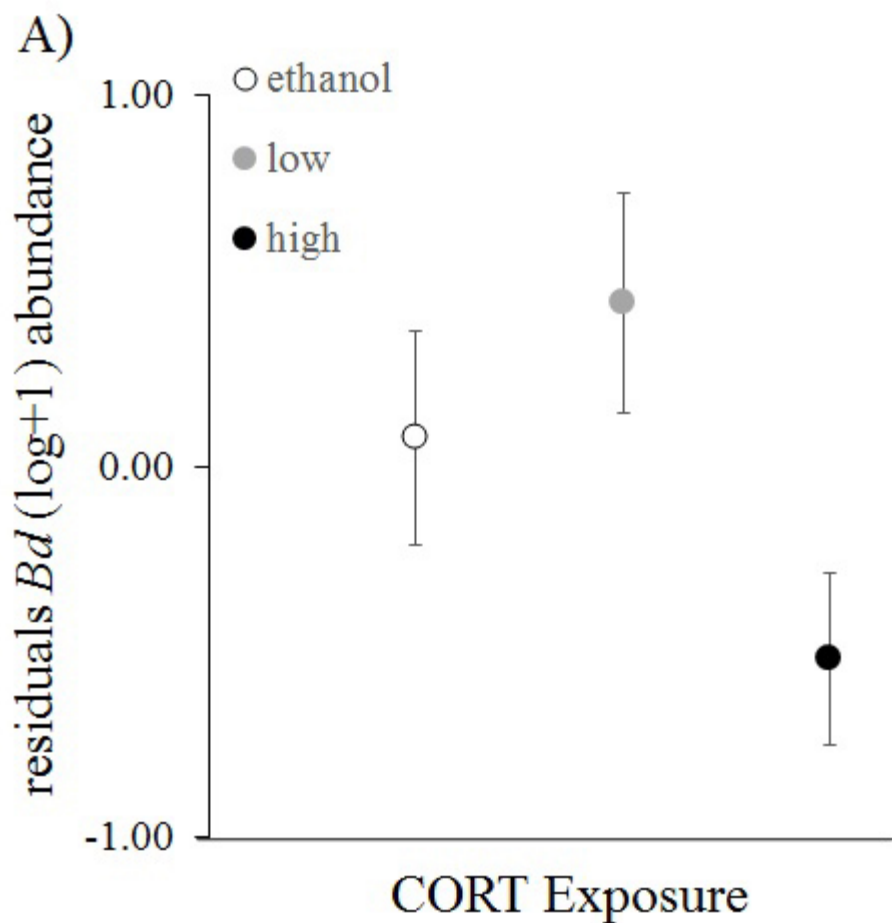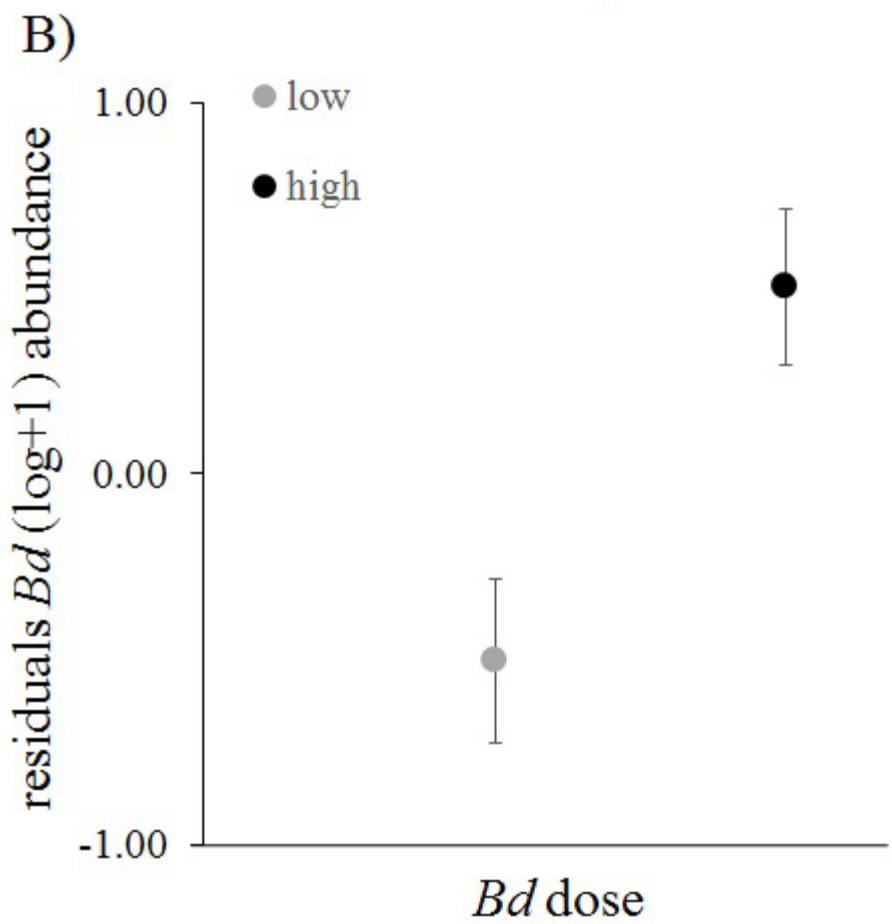

Supplement: pone.0163736.s004.pdf [file pone.0163736.s004.pdf]
