# Supplementary material for: Exposure to Corticosterone Affects Host Resistance, but Not Tolerance, to an Emerging Fungal Pathogen
Source: PubMed Central journal article supplement (PMC5045185; doi:10.1371/journal.pone.0163736), 2016-09-30
Supplement: pone.0163736.s006.pdf [file pone.0163736.s006.pdf]

**S1 Table**

| Predictor        | <i>F</i> value | d.f. | <i>P</i> value |
|------------------|----------------|------|----------------|
| CORT exposure    | 7.513          | 1    | 0.008          |
| <i>Bd</i> dose   | 9.990          | 1    | 0.002          |
| Mass             | 3.908          | 1    | 0.053          |
| Days Alive       | 12.203         | 1    | < 0.001        |
| CORT x <i>Bd</i> | 0.027          | 1    | 0.897          |
| Error            |                | 54   |                |
